# Supplementary material
Source: PubMed Central journal article supplement (PMC6170721)
Supplement: NIHMS980121-supplement-8.pdf [file NIHMS980121-supplement-8.pdf]

## Supplementary Table 2

| Oligo                | Sequence (5' to 3')      |
|----------------------|--------------------------|
| siGL2                | CGUACGCGGAAUACUUCGA      |
| siLINC00152_II       | UGACACACUUGAUUCGAAUA     |
| siLINC00152_III      | CCGGAAUGCAGCUGAAAGA      |
| LINC00152 primer 1 F | ATGCAGCTGAAAGATTCCCT     |
| LINC00152 primer 1 R | AGACTGGCCAGACAAATGG      |
| LINC00152 primer 2 F | CTCTACCTGTTGCCCGCC       |
| LINC00152 primer 2 R | GCAAATGCAGAGGCCTCAGA     |
| LINC00152 primer 3 F | TCCTTCTTAGTCGTGTGTACATCA |
| LINC00152 primer 3 R | AGAGCTTCCTGTTTCATCTCCC   |
| Actin primer F       | TGAAGGCTTTTGGTCTCCCTG    |
| Actin primer R       | TCAACTGGTCTCAAGTCAGTGT   |
| MALAT1 primer F      | AAGCAAGCAGTATTGTATCG     |
| MALAT1 primer R      | AGATGTTAAAACAAGCCCAG     |
| TPM2 primer F        | AGAGGTCTGTGGCAAAGTTG     |
| TPM2 primer R        | AGGTTGTTGAGTTCCAGCAG     |
| PTX3 primer F        | TTTTGGAAGCGTGCATCCAG     |
| PTX3 primer R        | TGTGGCTTTGACCCAAATGC     |
| IGFBP4 primer F      | ATCGAGGCCATCCAGGAAAG     |
| IGFBP4 primer R      | TTTTGGCGAAGTGCTTCTGC     |
| TGM2 primer F        | TGCCCTTTGGAAAGCCATTG     |
| TGM2 primer R        | TTTTTGCCTGCTCCAAGGAG     |
| SPP1 primer F        | TGCCAGCAACCGAAGTTTTC     |
| SPP1 primer R        | TGTCAGGTCTGCGAAACTTC     |
| LUM primer F         | TTGCGTTTGGATGGCAATCG     |
| LUM primer R         | GAGTGACTTCGTTAGCAACACG   |
| BCL2L11 primer #1 F  | TGGGAAGCATTGTTGTTGG      |
| BCL2L11 primer #1 R  | AAGCCTGCAACCAGAAAAGC     |
| BCL2L11 primer #2 F  | TTGTGCTGCTGGCTTTTCTG     |
| BCL2L11 primer #2 R  | TGGACTCTGCTGTAATGGACAC   |
