# Supplementary material
Source: PubMed Central journal article supplement (PMC6170721)

# Supplementary Figure 2

**A**

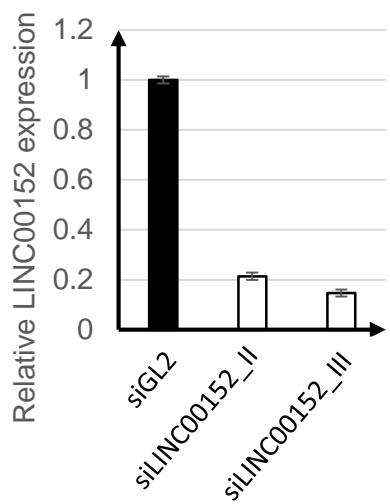

**B**

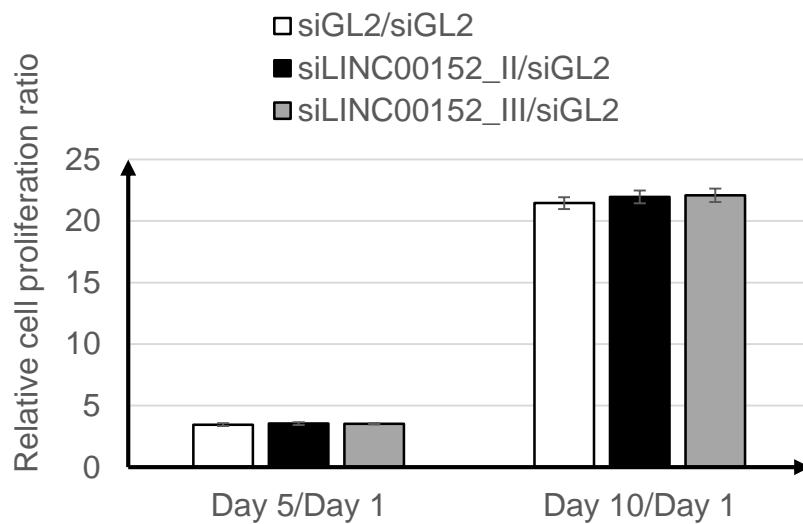

**C**

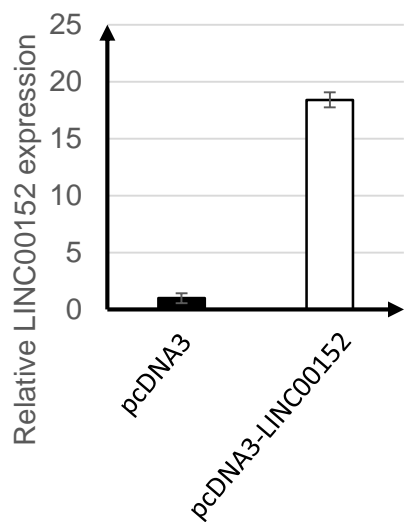

**D**

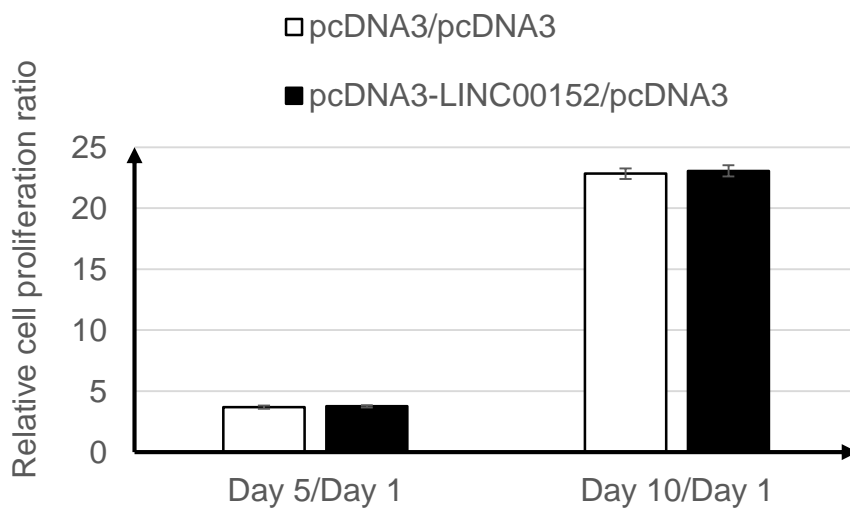

Supplement: NIHMS980121-supplement-2.pdf [file NIHMS980121-supplement-2.pdf]
